# Supplementary material for: Retinal pigment epithelial cell multinucleation in the aging eye – a mechanism to repair damage and maintain homoeostasis
Source: PubMed Central journal article supplement (PMC4854907; doi:10.1111/acel.12447), 2016-02-15

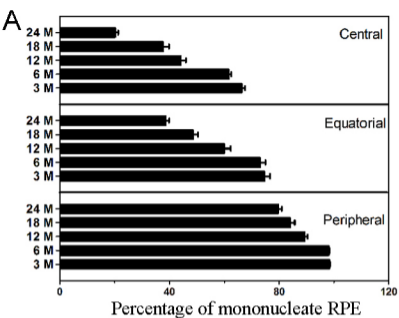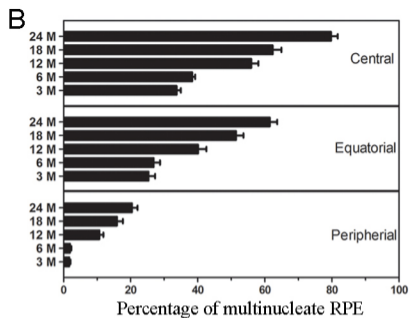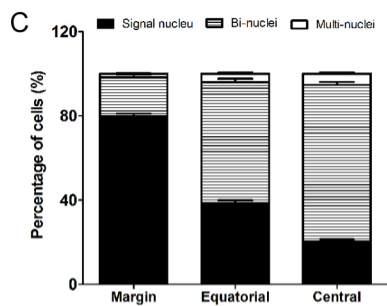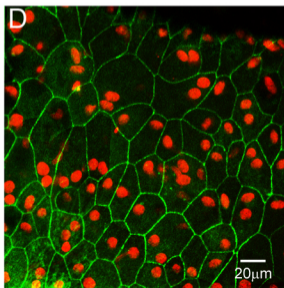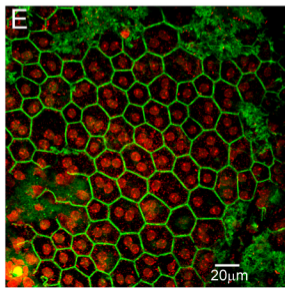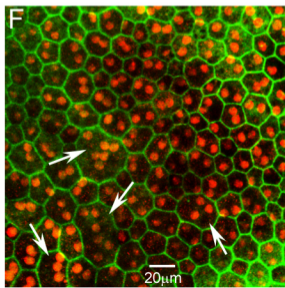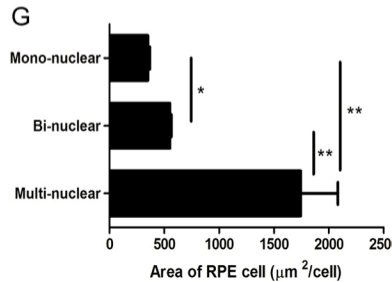

Supplement: ACEL-15-436-s001.pdf [file ACEL-15-436-s001.pdf]
